# Supplementary material for: New calix[4]arene based highly selective fluorescent probe for Al3+ and I−
Source: Royal Society of Chemistry journal article supplement (doi:10.1039/c5ay00452g), 2015-01-01
Supplement: c5ay00452g1.pdf [file c5ay00452g1.pdf]

**Supplementary Information**

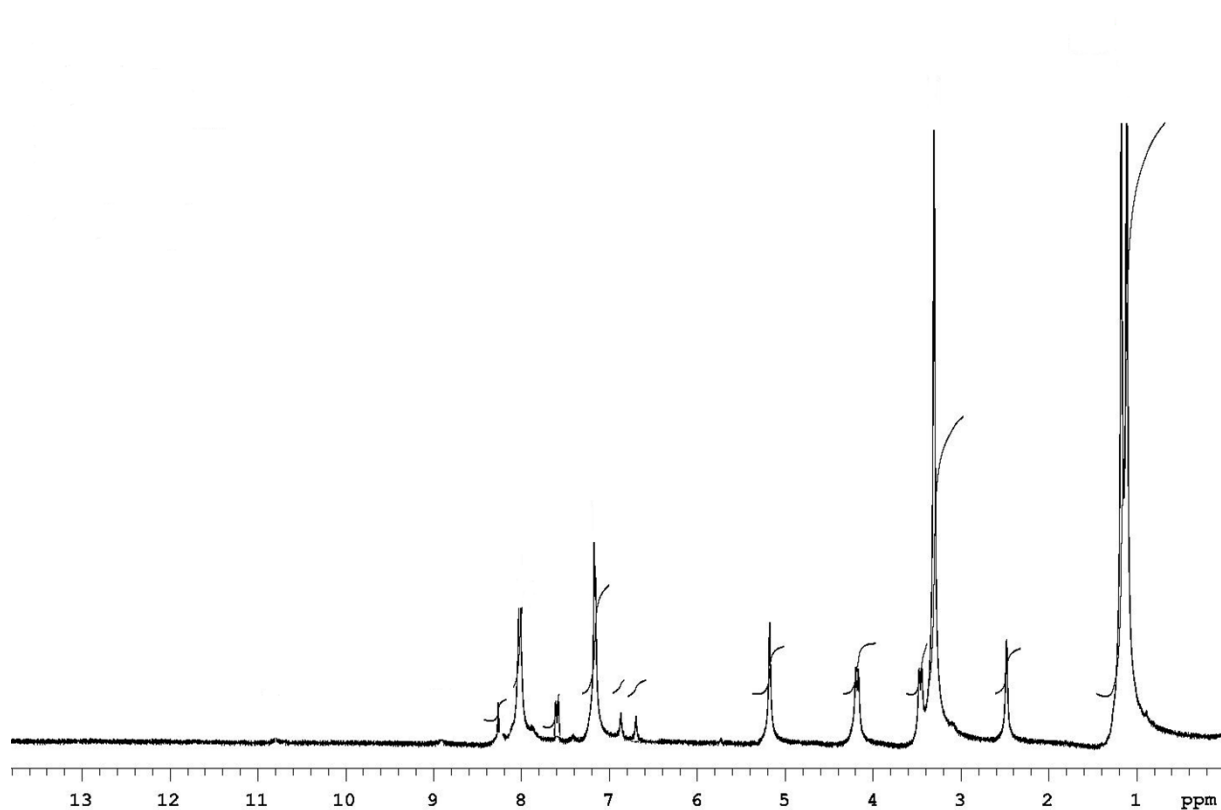

Fig. S1.  $^1\text{H}$ NMR spectrum of C4SB.

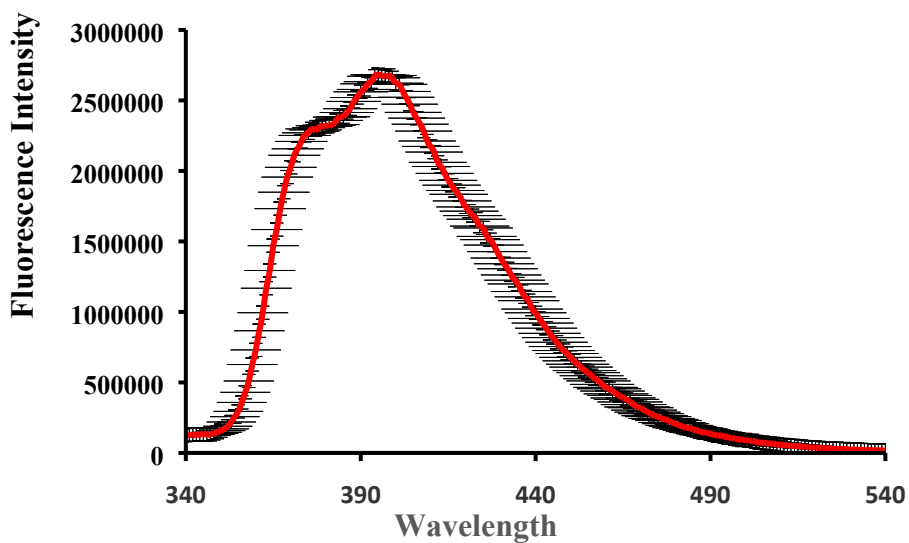

Fig. S2. (a) Each data point for  $\text{Al}^{3+}$  show the mean recovery value with error bar representing  $\pm$  SD for  $n=4$

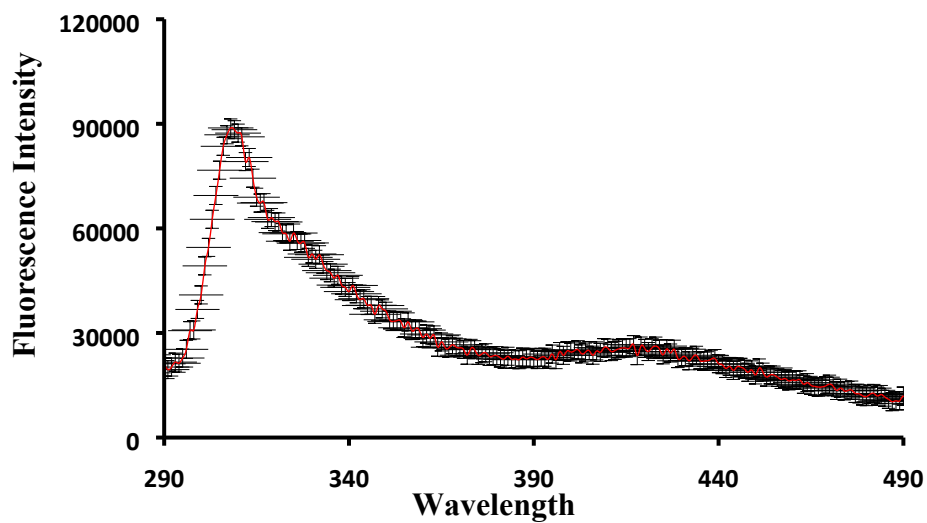

Fig. S2. (b) Each data point for  $\Gamma$  show the mean recovery value with error bar representing  $\pm$  SD for  $n=4$

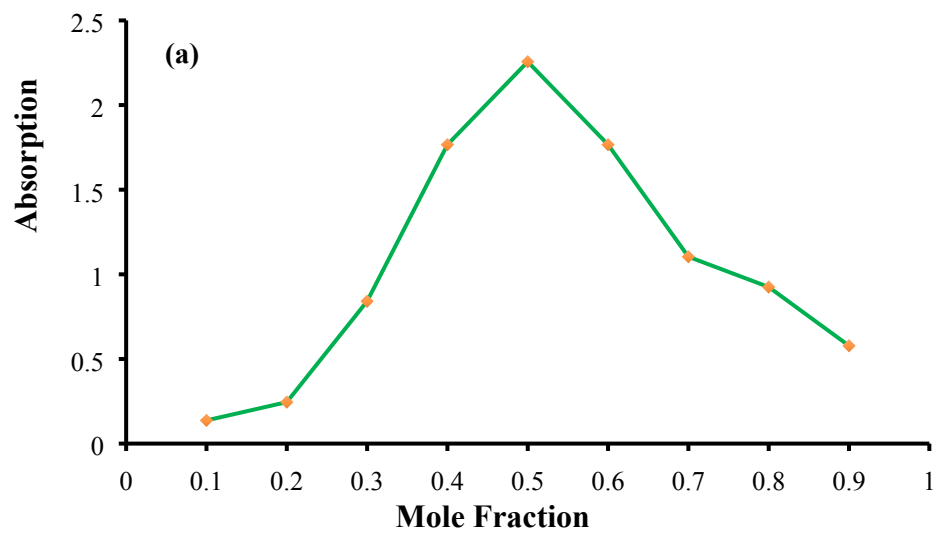

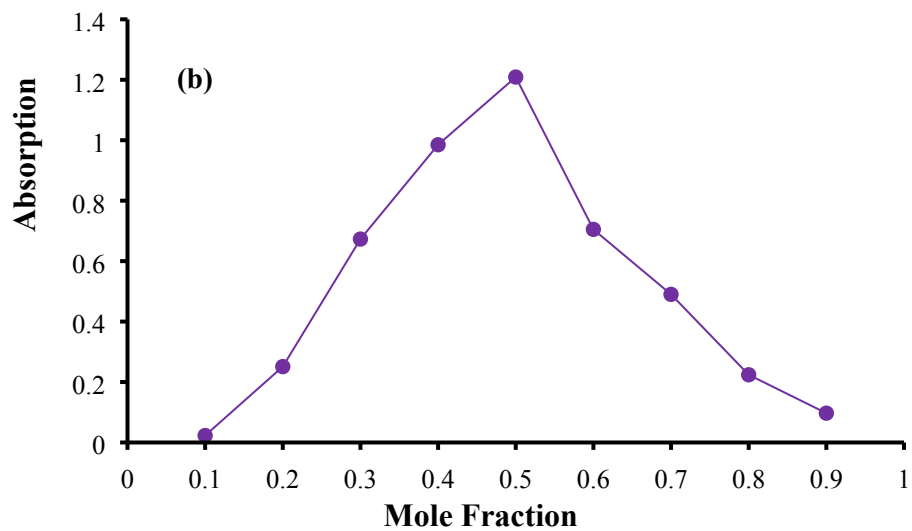

Fig. S3. Stoichiometric ratio of **C4SB-Al<sup>3+</sup>** complex (b) **C4SB-I** complex in THF+H<sub>2</sub>O.

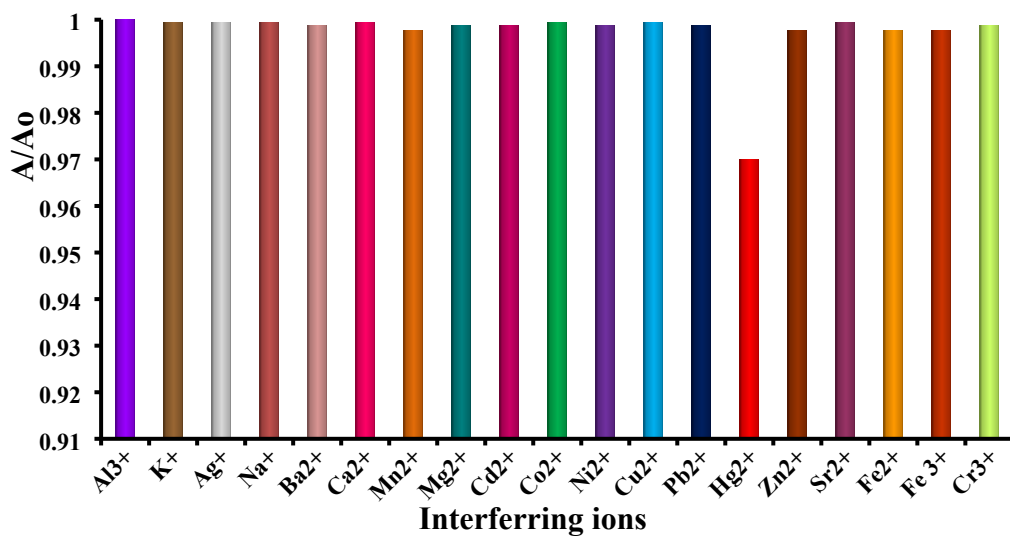

Fig. S4. Ratiometric responses of (**C4SB-Al<sup>3+</sup>** complex) toward interfering ions.

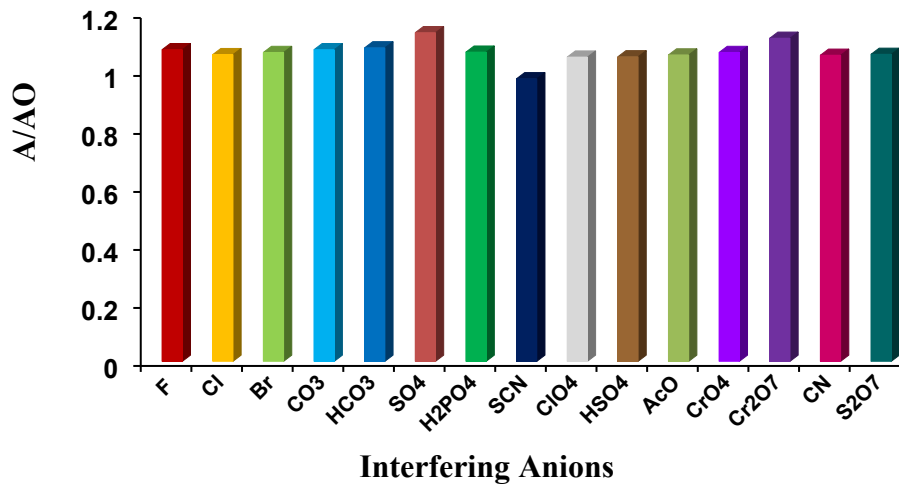

Fig. S5. Ratiometric response of (C4SB-I complex) toward interfering ions.

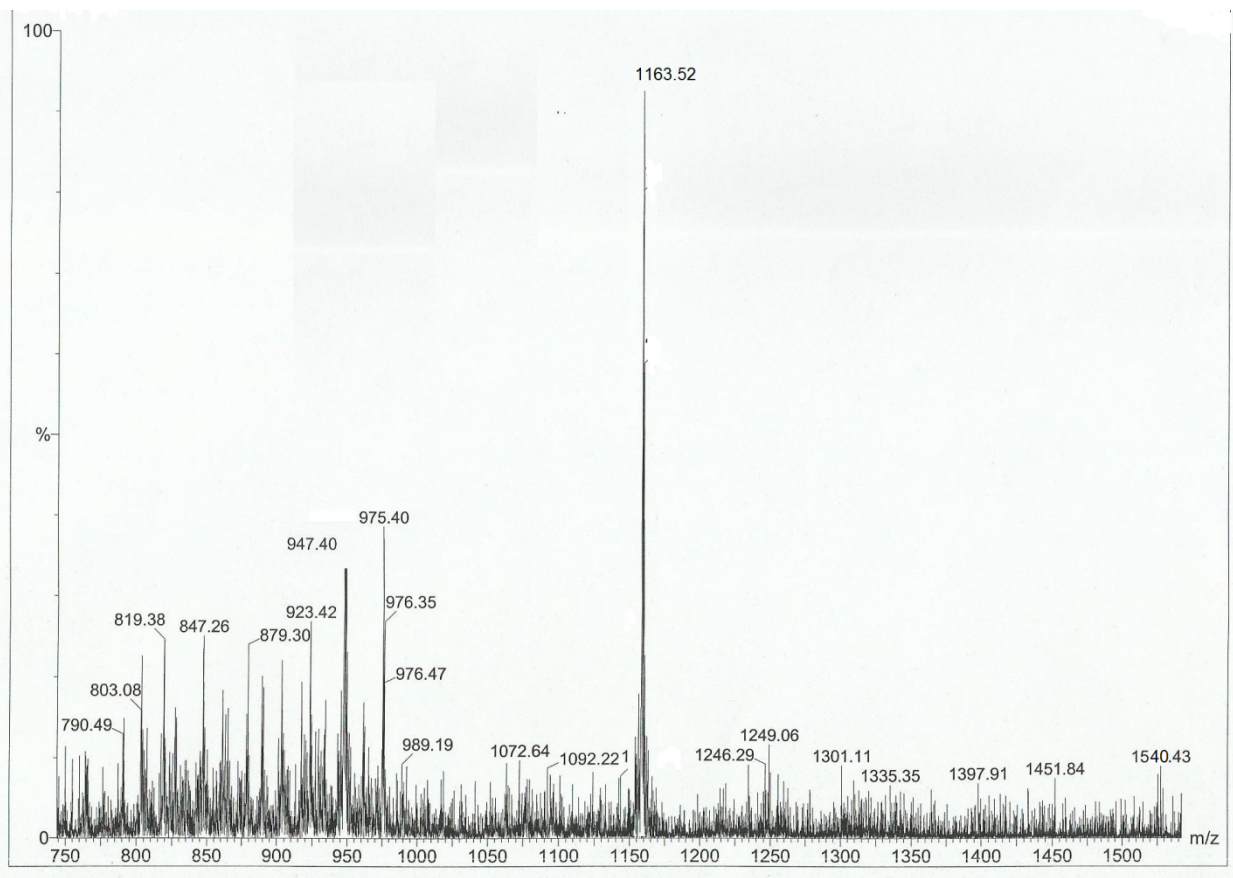

Fig. S6. ESI-MS spectrum of C4SB-Al<sup>3+</sup>

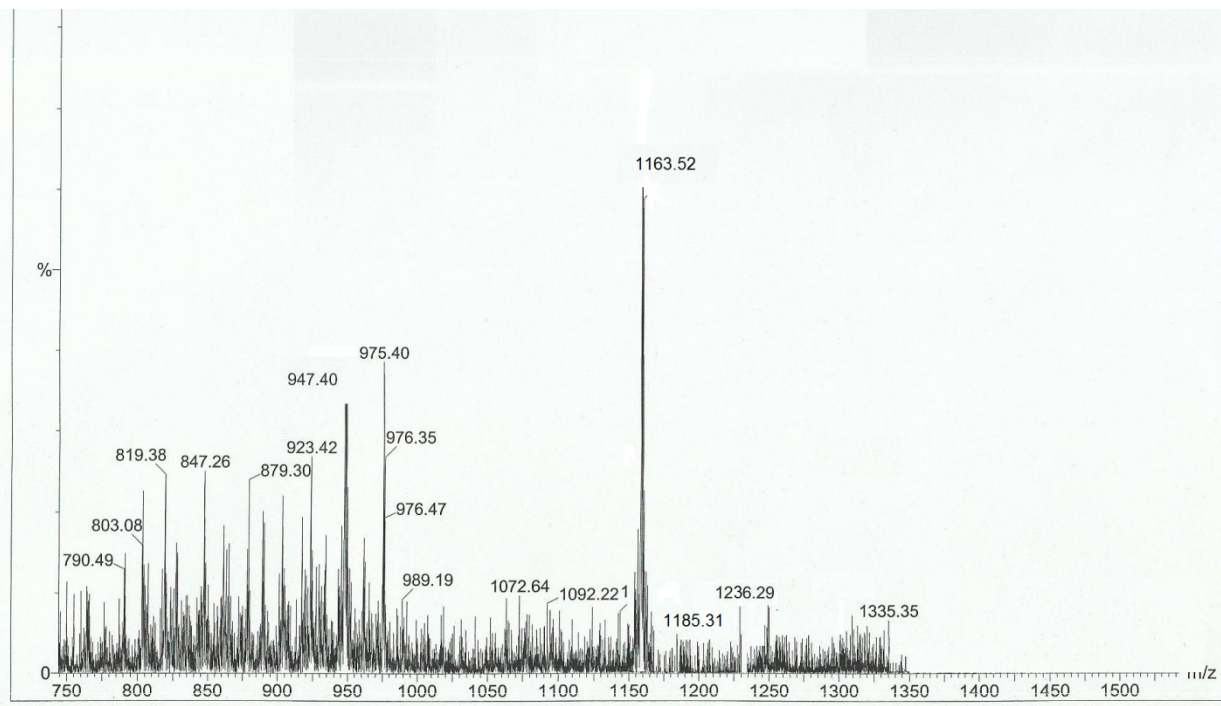

Fig. S7. ESI-MS spectrum of **C4SB-I**
